# Supplementary material
Source: PubMed Central journal article supplement (PMC4995894)
Supplement: IAI.00189-16_zii999091790so1.pdf [file IAI.00189-16_zii999091790so1.pdf]

**Supplemental Table 1. Selected single nucleotide polymorphisms in Haiti isolates (white) compared to nucleotide found in all Wave 1 strains (grey).**

SNPs were selected for:

- a. nonsynonymous (lead to change of amino acid in encoded protein)
- b. synapomorphic (arise in Wave 2 and 3 and persist into Haiti isolates)
- c. SNPs in intergenic regions including possible sRNAs were not analyzed
- d. SNPs found in at least 10 sequenced Haiti isolates (3 of 10 analyzed shown)

NCBI nt number for N16961 genome may be approximate as annotation at NCBI changes.

Small s indicated chromosome II

VC# based on annotation of N16961 with A indicating ORF from chromosome II

Black box signifies data are missing in genome for this nucleotide at time of analysis.

|    |          |       | Wave 1 |       |     | Wave 2 |     |        | Wave 3 |         |        |         |        |        | Haiti   |         |             |             |             |
|----|----------|-------|--------|-------|-----|--------|-----|--------|--------|---------|--------|---------|--------|--------|---------|---------|-------------|-------------|-------------|
|    | NCBI     | VC#   | N16961 | E7946 | RC9 | MO10   | B33 | MJ1236 | CP1041 | Nepal-1 | CP1042 | CIRS101 | CP1038 | CP1048 | Nepal-2 | Nepal-3 | 2010EL-1786 | 2010EL-1798 | 2010EL-1792 |
| 1  | 280524   | 0275  | G      | G     | G   | A      | A   | A      | A      | A       | A      | A       | A      | A      | A       | A       | A           | A           | A           |
| 2  | 299198   | 0289  | C      | C     | C   | T      | T   | T      | T      | T       | T      | T       | T      | T      | T       | T       | T           | T           | T           |
| 3  | 716085   | 0668  | T      | T     | T   | C      | C   | C      | C      | C       | C      | C       | C      | C      | C       | C       | C           | C           | C           |
| 4  | 775761   | 0722  | C      | C     | C   | A      | A   | A      | A      | A       | A      | A       | A      | A      | A       | A       | A           | A           | A           |
| 5  | 795549   | 0742  | G      | G     | G   | T      | T   | T      | T      | T       | T      | T       | T      | T      | T       | T       | T           | T           | T           |
| 6  | 1024415  | 0959  | C      | C     | C   | T      | T   | T      | T      | ■       | T      | T       | T      | T      | ■       | ■       | T           | T           | T           |
| 7  | 1469439  | 1376  | A      | A     | A   | T      | T   | T      | T      | T       | T      | T       | T      | T      | T       | T       | T           | T           | T           |
| 8  | 1822870  | 1689  | C      | C     | C   | T      | T   | T      | T      | T       | T      | T       | T      | T      | T       | T       | T           | T           | T           |
| 9  | 2005891  | 1865  | T      | T     | T   | G      | G   | G      | G      | G       | G      | G       | G      | G      | G       | G       | G           | G           | G           |
| 10 | 2021734  | 1877  | C      | C     | C   | A      | A   | A      | A      | A       | A      | A       | A      | A      | A       | A       | A           | A           | A           |
| 11 | 2234255  | 2077  | C      | C     | C   | T      | T   | T      | T      | T       | T      | T       | T      | T      | T       | T       | T           | T           | T           |
| 12 | 2295495  | 2140  | T      | T     | T   | C      | C   | C      | C      | C       | C      | C       | C      | C      | C       | C       | C           | C           | C           |
| 13 | 2441036  | 2285  | C      | C     | C   | A      | A   | A      | A      | A       | A      | A       | A      | A      | A       | A       | A           | A           | A           |
| 14 | 2518802  | 2362  | A      | A     | A   | G      | G   | G      | G      | G       | G      | G       | G      | G      | G       | G       | G           | G           | G           |
| 15 | 2657154  | 2476  | G      | G     | G   | A      | A   | A      | A      | ■       | A      | A       | A      | A      | ■       | ■       | A           | A           | A           |
| 16 | 2744540  | 2562  | C      | C     | C   | T      | T   | T      | T      | T       | T      | T       | T      | T      | T       | T       | T           | T           | T           |
| 17 | s30692   | A0025 | C      | C     | C   | T      | T   | T      | T      | T       | T      | T       | T      | T      | T       | T       | T           | T           | T           |
| 18 | s62965   | A0055 | C      | C     | C   | T      | T   | T      | T      | ■       | T      | T       | T      | T      | ■       | ■       | T           | T           | T           |
| 19 | s1047775 | A1092 | G      | G     | G   | A      | A   | A      | A      | A       | A      | A       | A      | A      | A       | A       | A           | A           | A           |
| 20 | 463918   | 0433  | G      | G     | G   | A      | A   | A      | A      | A       | A      | G       | A      | A      | A       | A       | A           | A           | A           |
| 21 | 144581   | 0154  | G      | G     | G   | G      | A   | A      | A      | ■       | A      | A       | A      | A      | ■       | ■       | A           | A           | A           |
| 22 | 182735   | 0180  | C      | C     | C   | C      | T   | C      | T      | T       | T      | T       | T      | T      | T       | T       | T           | T           | T           |
| 23 | 769067   | 0751  | C      | C     | C   | C      | T   | T      | T      | T       | T      | T       | T      | T      | T       | T       | T           | T           | T           |
| 24 | s439412  | A0510 | T      | T     | T   | T      | C   | C      | C      | C       | C      | C       | C      | C      | C       | C       | C           | C           | C           |
| 25 | s572465  | A0637 | G      | G     | G   | G      | A   | A      | A      | A       | A      | A       | A      | A      | A       | A       | A           | A           | A           |
| 26 | 1567151  | 1456  | A      | A     | A   | A      | A   | G      | G      | G       | G      | G       | G      | G      | G       | G       | G           | G           | G           |
| 27 | 1567239  | 1456  | A      | A     | A   | A      | A   | G      | G      | G       | G      | G       | G      | G      | G       | G       | G           | G           | G           |
| 28 | s62965   | A0055 | C      | C     | C   | C      | ■   | T      | T      | ■       | T      | T       | T      | T      | ■       | ■       | T           | T           | T           |
